# Supplementary material for: Image Decomposition Algorithm for Dual-Energy Computed Tomography via Fully Convolutional Network
Source: Comput Math Methods Med. 2018 Sep 5;2018:2527516. doi: 10.1155/2018/2527516 (PMC6145159; doi:10.1155/2018/2527516)
Supplement: Supplementary Materials — Figure S1: the proposed model contains about 64k unsolved parameters and is trained for 40 epochs in 37 hours. The training batch size is 1200 reconstructed images from the noise-corrupted low- and high-energy projections. Figures S2 and S3: more testing results to show the superiority of the proposed method. All the testing images are reconstructed from the noise-corrupted low- and high-energy projections. [file 2527516.f1.zip]

Archive with 3 entries (3 files):
- 2527516.f1/Figure S1_CMMM_2422009.eps
- 2527516.f1/Figure S2_CMMM_2422010.ps
- 2527516.f1/Figure S3_CMMM_2422011.ps
